# Supplementary material
Source: PubMed Central journal article supplement (PMC7117340)
Supplement: mmc1.pdf [file mmc1.pdf]

Table S1. Thirty-eight PEDV reference strains used in this study

| Strain name           | Year | Place of isolation | Genbank<br>no. | Accession |
|-----------------------|------|--------------------|----------------|-----------|
| PEDV 1842/2016<br>ITA | 2016 | Italy/Teramo       | KY111278       |           |
| AH-2012               | 2012 | China/Anhui        | KC210145       |           |
| AH-M                  | 2011 | China/Anhui        | KJ158152       |           |
| Br1/87                | 1993 | Great British      | Z25483         |           |
| CH1                   | 2011 | China/Hubei        | JQ239429       |           |
| CH9                   | 2011 | China/Fujian       | JQ979287       |           |
| CH/AY/11              | 2011 | China/Henan        | JQ627653       |           |
| CH/FJND-1/2011        | 2011 | China/Heilongjiang | JN543367       |           |
| CH/FJZZ-9/2012        | 2012 | China/Fujian       | KC140102       |           |
| CHGD-01               | 2011 | China/Guangdong    | JN980698       |           |
| CH/HNQX-3/14          | 2015 | China/Henan        | KR095279       |           |
| CH/HNZZ47/2016        | 2016 | China/Henan        | KX981440       |           |
| Chinju99              | 1999 | South Korea        | AY167585       |           |
| CH/JX-1/2013          | 2013 | China/Jiangxi      | KF760557       |           |
| CH/S                  | 1986 | China/Heilongjiang | JN547228       |           |
| CH/ZJCX-1/2012        | 2012 | China/Zhejiang     | KF840537       |           |
| CH/ZMDZY/11           | 2011 | China/Henan        | KC196276       |           |
| CV777(prototype)      | 1978 | Belgium            | AF353511       |           |
| CV777(vaccine)        | 1994 | China/Heilongjiang | JN599150       |           |
| DR13(attenuated)      | 2003 | South Korea        | JQ023162       |           |
| DR13(virulent)        | 1999 | South Korea        | JQ023161       |           |
| DX(culture adapted)   | 2007 | China/Gansu        | EU031893       |           |
| GD-A                  | 2012 | China/Guangdong    | JX112709       |           |
| GD-B                  | 2012 | China/Guangdong    | JX088695       |           |
| HUA-PED45             | 2013 | Viet Nam           | KP455313       |           |
| IA1                   | 2013 | USA                | KF468753       |           |
| IA2                   | 2013 | USA                | KF468754       |           |
| JS2008                | 2008 | China/Jiangsu      | KC109141       |           |
| JSCZ1601-S            | 2016 | China/Jiangsu      | KY070587       |           |
| JS-HZ2012             | 2012 | China/Jiangsu      | KC210147       |           |
| LZC                   | 2006 | China/Gansu        | EF185992       |           |
| PC22A-P140.BI         | 2016 | USA                | KX580958       |           |
| PEDV-LYG              | 2014 | China/Jiangsu      | KM609212       |           |
| SD-M                  | 2012 | China/Shandong     | JX560761       |           |
| SHQP/YM/2013          | 2013 | China/Shanghai     | KJ196348       |           |
| SM98                  | 1998 | South Korea        | GU937797       |           |
| XM2-4-S               | 2016 | China/Fujian       | KX812524       |           |
| ZJ13LY1201            | 2014 | China/Zhejiang     | KM213245       |           |
